# Supplementary material for: Fault diagnosis in nuclear power plants using an artificial neural network technique
Source: MDPI journal article supplement (doi:10.3390/md21010041), 1993-01-01

**Type-I Hemins and Free Porphyrins from a Western Australian Sponge *Isabela* sp.**

**Supporting Information**

Samuele Sala<sup>\*†‡</sup>, Stephen A. Moggach<sup>†</sup>, Gareth L. Nealon<sup>†</sup>, Jane Fromont<sup>‡</sup>, Oliver Gomez<sup>‡</sup>, Daniel  
Vuong<sup>§</sup>, Ernest Lacey<sup>§</sup> and Gavin. R. Flematti<sup>\*†</sup>.

<sup>†</sup>School of Molecular Sciences, The University of Western Australia, Crawley, WA 6009, Australia

<sup>‡</sup>Australian National Phenome Centre and Centre for Computational and Systems Medicine, Health  
Futures Institute, Murdoch University, Harry Perkins Building, Perth, WA 6150, Australia

<sup>‡</sup>Collection and Research, Western Australian Museum, Welshpool, WA 6106, Australia

<sup>§</sup>Microbial Screening Technologies Pty. Ltd., Smithfield, NSW 2164, Australia

\*To whom correspondence should be addressed

SS: Current address: Australian National Phenome Centre and Centre for Computational and Systems  
Medicine, Health Futures Institute, Murdoch University, Harry Perkins Building, Perth, WA 6150,  
Australia

T: +61 4 0116 9864; E: [Samuele.Sala@murdoch.edu.au](mailto:Samuele.Sala@murdoch.edu.au)

GRF: The University of Western Australia; Perth, WA, 6009, Australia; T: +61 8 64884461; E:  
[gavin.flematti@uwa.edu.au](mailto:gavin.flematti@uwa.edu.au);

## Contents

|                                                                                                    |   |
|----------------------------------------------------------------------------------------------------|---|
| S1. $^1\text{H}$ NMR of isabellin A ( <b>1a</b> ) (600 MHz, $\text{CDCl}_3$ ) .....                | 3 |
| S2. COSY NMR of isabellin A ( <b>1a</b> ) (600 MHz, $\text{CDCl}_3$ ) .....                        | 4 |
| S3. HSQC NMR of isabellin A ( <b>1a</b> ) (600 MHz, 150 MHz, $\text{CDCl}_3$ ) .....               | 5 |
| S4. HMBC NMR of isabellin A ( <b>1a</b> ) (600 MHz, 150 MHz, $\text{CDCl}_3$ ) .....               | 6 |
| S5. $^1\text{H}$ NMR of isabellin B ( <b>2a</b> ) (600 MHz, $(\text{CH}_3)_2\text{CO}$ ) .....     | 7 |
| S6. NOESY NMR of isabellin B ( <b>2a</b> ) (600 MHz, $(\text{CH}_3)_2\text{CO}$ ) .....            | 8 |
| S7. NOESY NMR of isabellin B ( <b>2a</b> ) (600 MHz, $(\text{CH}_3)_2\text{CO}$ ), expansion ..... | 9 |

S1.  $^1\text{H}$  NMR of isabellin A (**6.1a**) (600 MHz,  $\text{CDCl}_3$ )

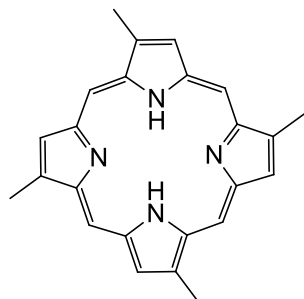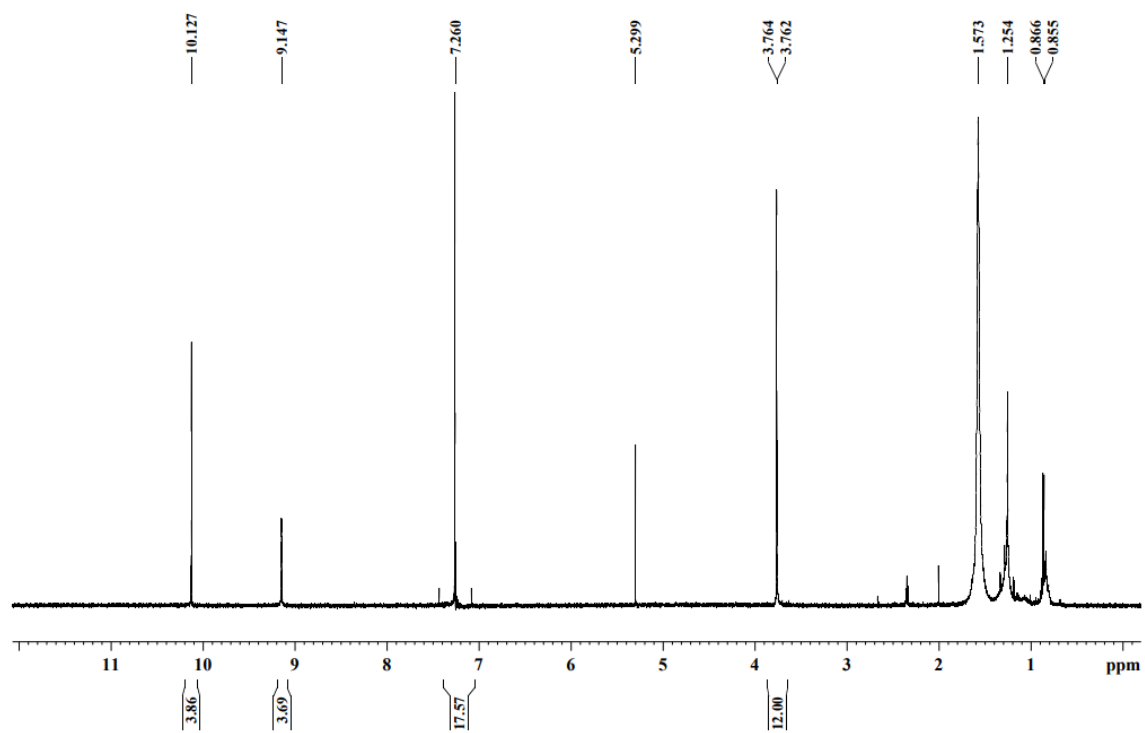

S2. COSY NMR of isabellin A (**6.1a**) (600 MHz, CDCl<sub>3</sub>)

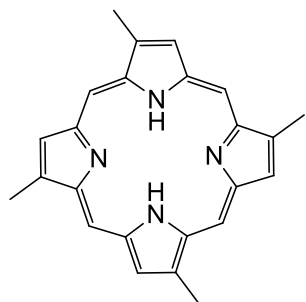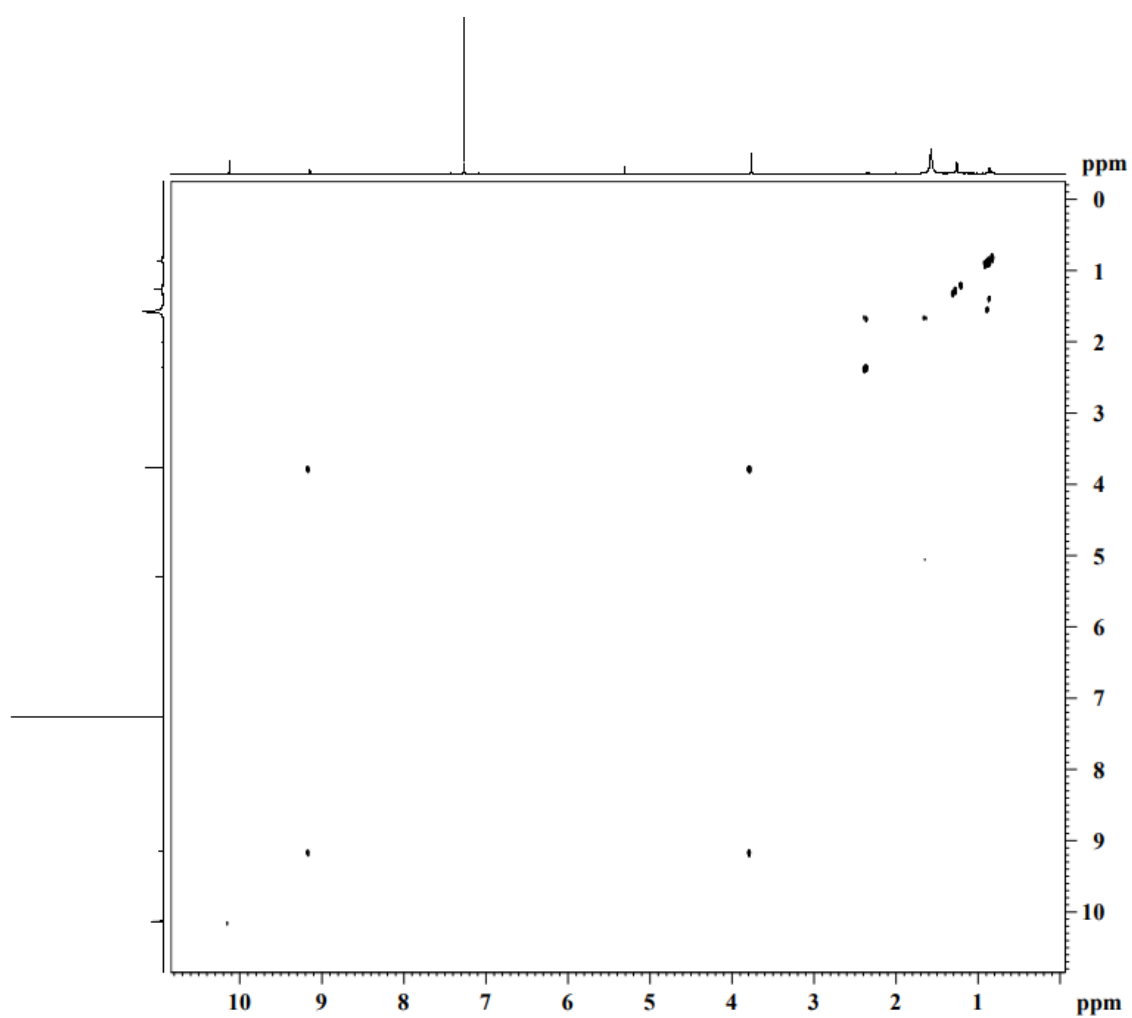

S3. HSQC NMR of isabellin A (**6.1a**) (600 MHz, 150 MHz, CDCl<sub>3</sub>)

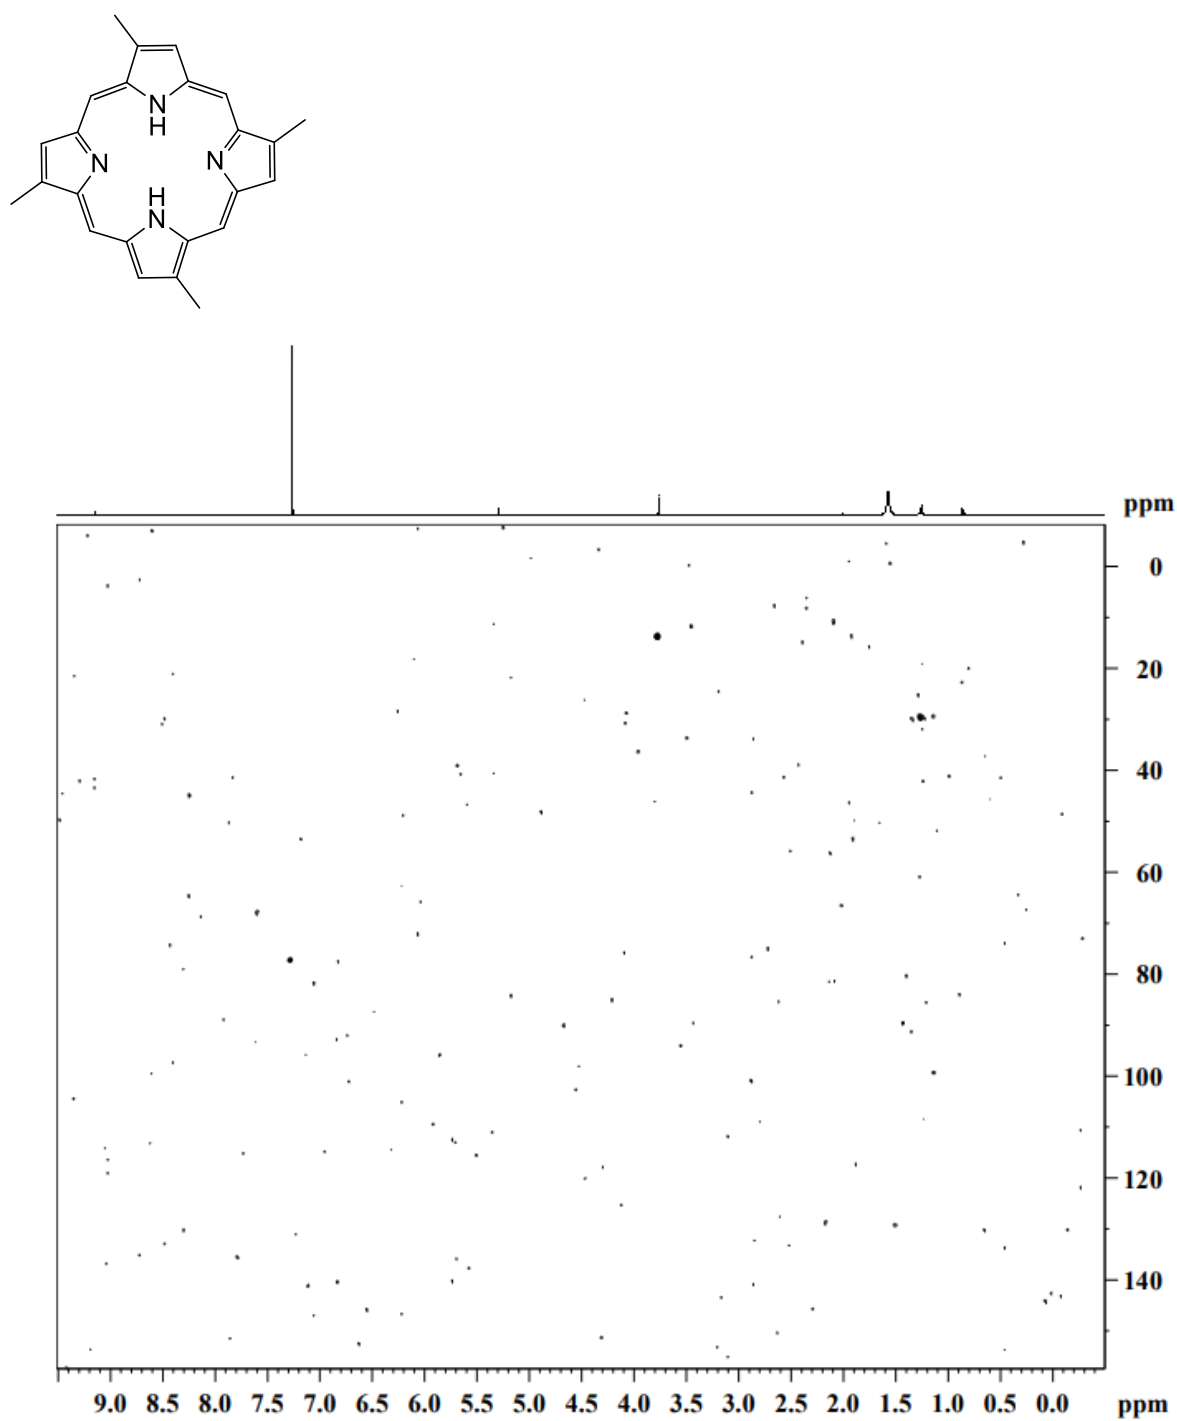

S4. HMBC NMR of isabellin A (**6.1a**) (600 MHz, 150 MHz, CDCl<sub>3</sub>)

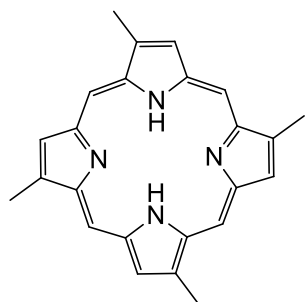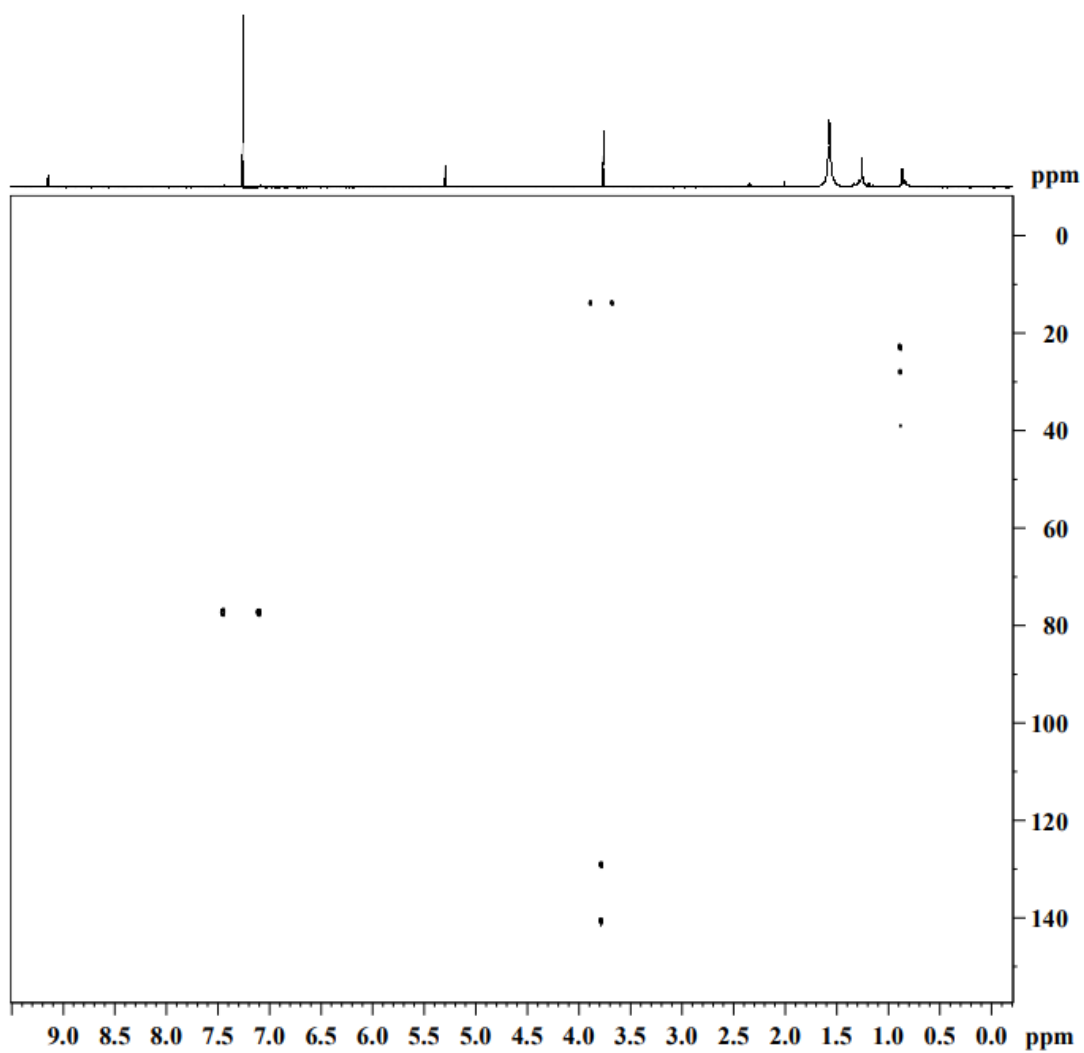

S5.  $^1\text{H}$  NMR of isabellin B (**6.2a**) (600 MHz,  $(\text{CH}_3)_2\text{CO}$ )

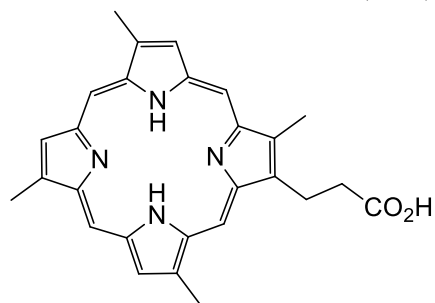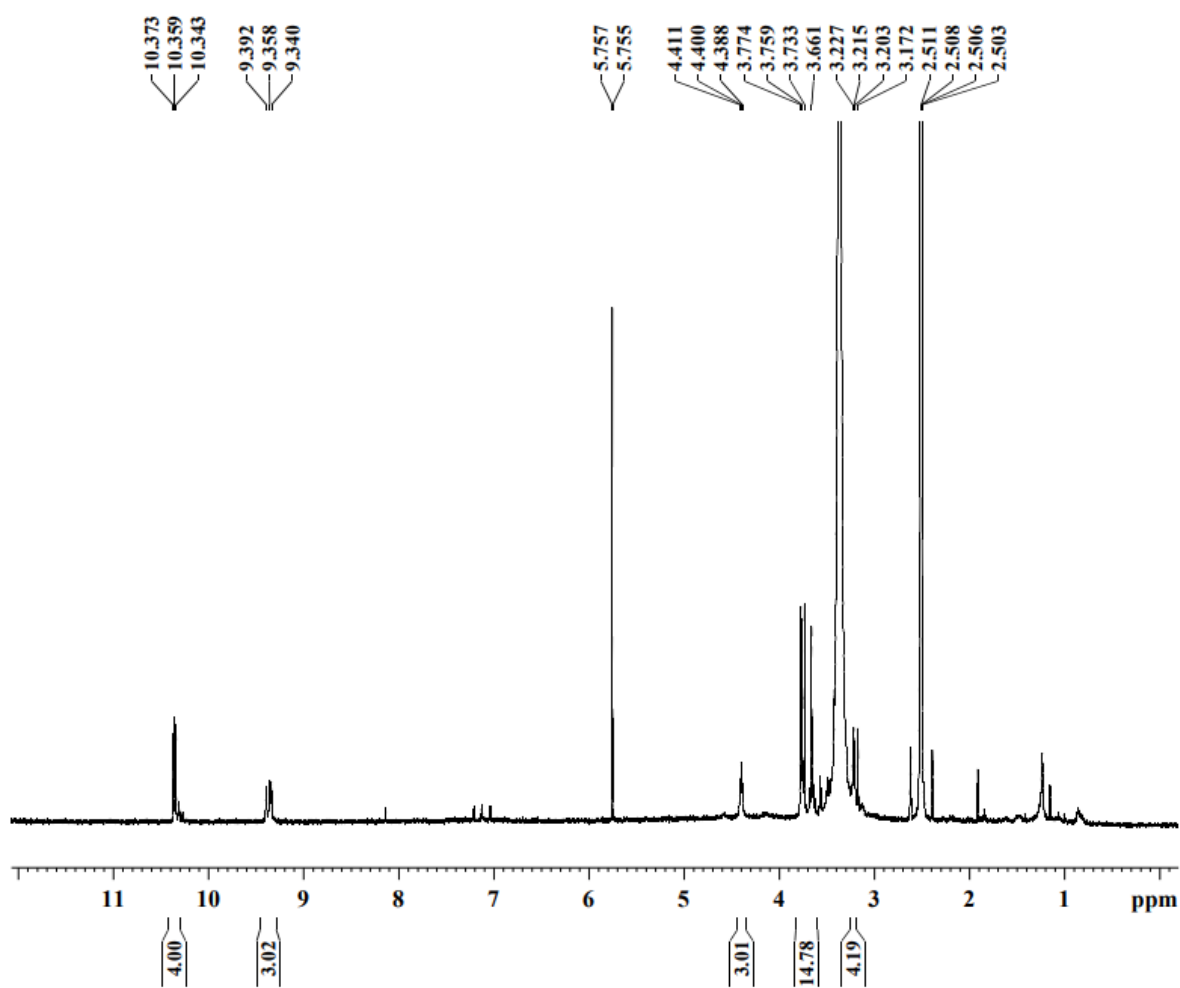

S6. NOESY NMR of isabellin B (**6.2a**) (600 MHz, (CH<sub>3</sub>)<sub>2</sub>CO)

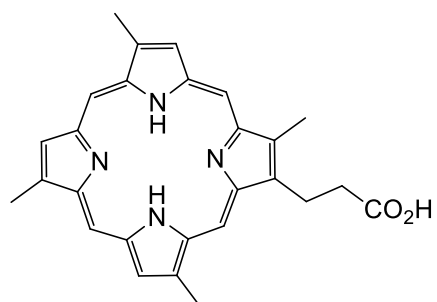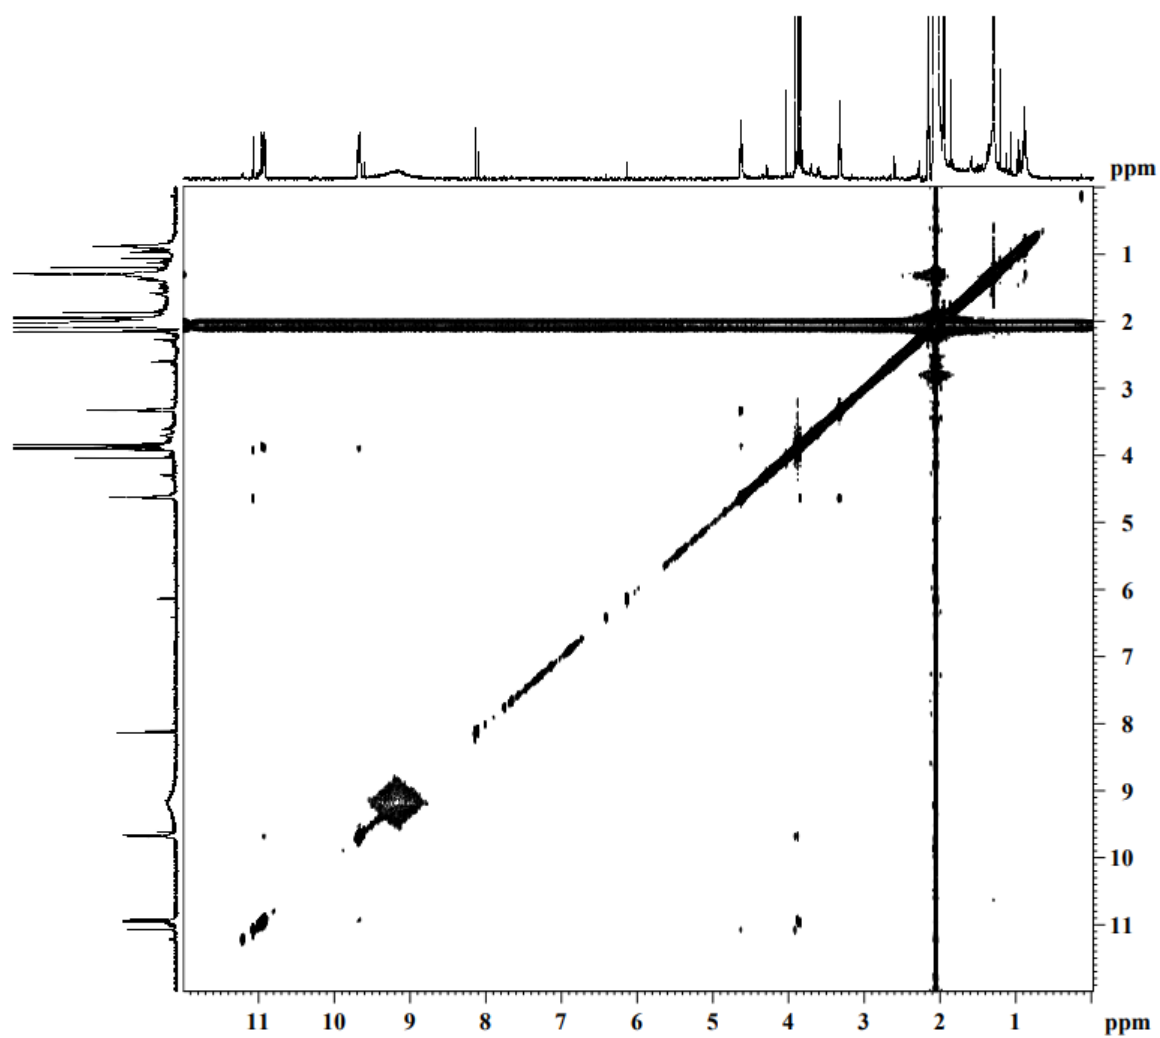



S7. NOESY NMR of isabellin B (**6.2a**) (600 MHz, (CH<sub>3</sub>)<sub>2</sub>CO), expansion

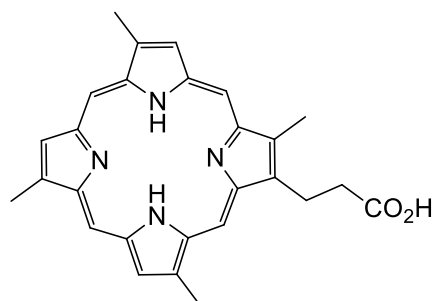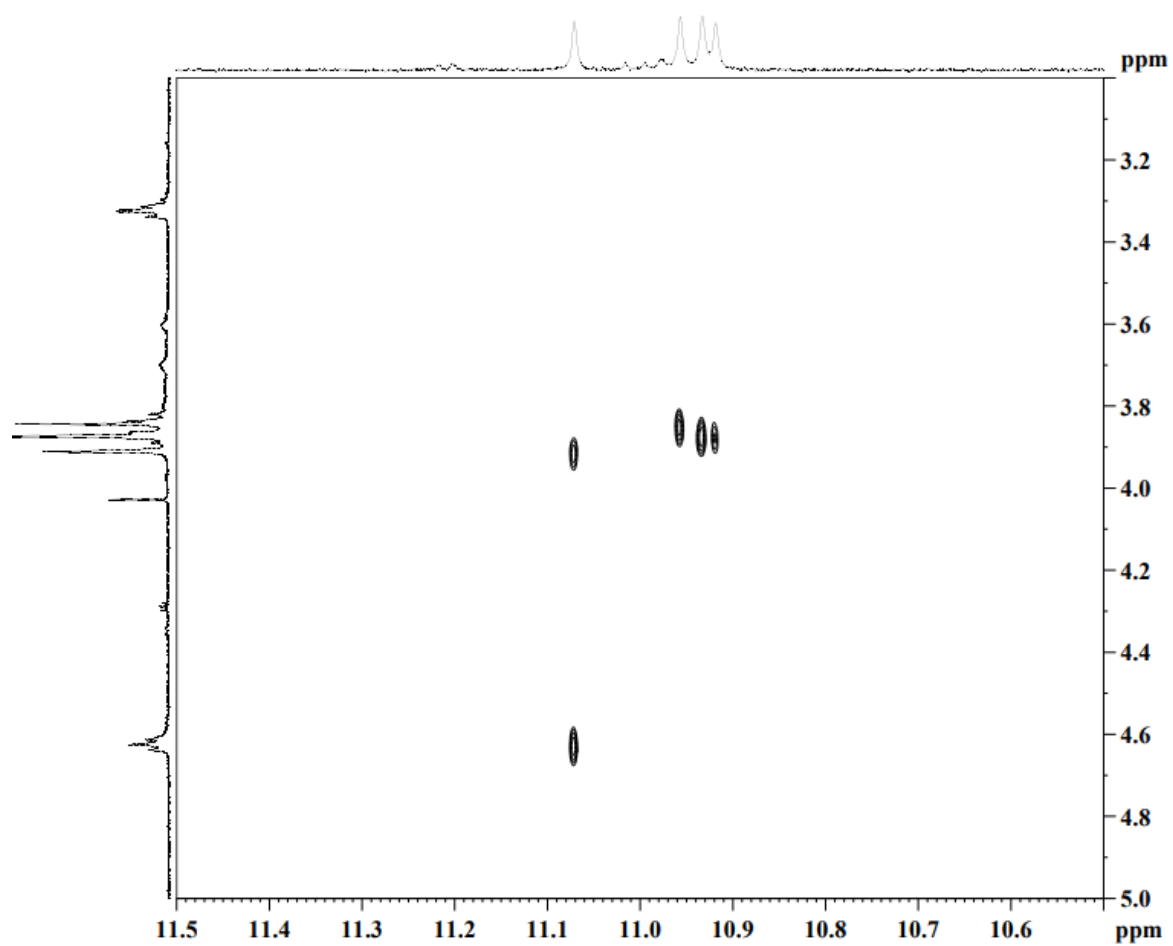

Supplement: s1 [file s1]
